# Supplementary material
Source: PubMed Central journal article supplement (PMC3065018)
Supplement: NIHMS274887-supplement-01.pdf [file NIHMS274887-supplement-01.pdf]

## Supplemental Figure Legends

**Figure S1.** Intronic sequences are detectable in dendritic mRNA using microarray analysis and Illumina sequencing. (A) Heatmap of microarray signals for 92 intronic sequence probes (rows) for three independent rat hippocampal dendrite populations (columns). Data are presented as normalized log-fold intensity difference of dendritic RNA compared to a null reference sample. Selected groups of introns are labeled with gene abbreviations. Red indicates high signal, green indicates low. Signal range indicator displayed at bottom. (B) Gene features detected by Illumina sequencing of three independent rat hippocampal dendrite populations. Pooled exonic (E) and individual intronic (i) regions are labeled for each bar graph for each gene (see Table S2 for full annotation). Scale indicates log<sub>2</sub> transformed counts of sequencing hits summed over all samples. (C) PCR products generated from dendritic cDNA templates for intronic sequences. Primers sets used are the same as those for microarray positives with inconclusive Illumina sequencing read evidence. Bands were subcloned and confirmed by sequencing. 1KB Plus DNA ladder shown for size estimates. STX1Ai1 and STX1Ai9 failed to yield PCR products and were subsequently removed as candidate retained introns.

**Figure S2.** Exon and intron directed antisense *in situ* hybridization results with sense strand controls. Antisense *in situ* hybridization results from Figure 2 are presented along with MAP2 immunostaining (insets) to confirm neuronal area within fields. Antisense

probe results (left) are presented with corresponding sense strand probe results (right) for each target exon and intron. (A) CAMK2Be3, (B) CAMK2Bi3, (C) FMR1e1, (D) FMR1i1, (E) GABRG3e5, (F) GABRG3i5, (G) GRIK1e1, (H) GRIK1i1.

**Figure S3.** *In situ* hybridization results with calculation paths for EGFP (A) and FMR1i1ID1 (B) transfected hippocampal neurons. Paths are shown against MAP2 immunostaining (left panels) along with zoomed regions (dashed lines) shown at higher magnitude (bottom) for individual dendrites. Blue text indicates transfected DNA construct, white text indicates *in situ* probe sequence. (C) Intronic B2 element sequence does not confer dendritic localization to reporter gene mRNA. *In situ* hybridizations with antisense biotinylated EGFP riboprobe on primary hippocampal neurons transfected with FMR1i1B2-EGFP. Blue text indicates transfected DNA construct, white text indicates *in situ* probe sequence. Inset represents MAP2 immunostaining. (D) Immunostaining results to confirm translation of EGFP after transfection with ID-EGFP fusion constructs. Immunofluorescence with antibody to GFP on primary hippocampal neurons transfected with FMR1i1ID1-EGFP. Blue text indicates transfected DNA construct, white text indicates antibody target. All scale bars = 20 $\mu$ m.

**Figure S4.** Intronic ID element sequences disrupt dendritic localization patterns of endogenous mRNA. *In situ* hybridizations with antisense biotinylated intron riboprobes on primary hippocampal neurons transfected with pEGFP-N1, GABRG3i5ID2-EGFP (A), and GRIK1i1ID4-EGFP (B) constructs. Graphs at right represent *in situ* signal  $\Delta F/F$

against distance from soma for ID-EGFP constructs versus pEGFP-N1 (C) Additional ID element cross-competition *in situ* hybridization results. *In situ* hybridizations with antisense biotinylated intron riboprobes on primary hippocampal neurons transfected with pEGFP-N1, CAMK2B<sub>i</sub>3ID1-EGFP, FMR1<sub>i</sub>1ID1-EGFP, GABRG3<sub>i</sub>5ID2-EGFP, and GRIK1<sub>i</sub>1ID4-EGFP constructs. Blue text indicates transfected DNA construct, white text indicates *in situ* probe sequence. Insets represent MAP2 immunostaining. Scale bars = 20 $\mu$ m.

## Supplemental Table Legends

**Table S1.** Comparison of microarray probe signals (rows) when hybridized with dendritic RNA versus background random hexamer RNAs. Mean normalized signal over three array replicates are reported for dendritic RNA and over two replicates for hexamer RNA. Individual t tests were performed per probe (3 d.o.f.) to test that the mean intensity for dendritic RNA is greater than the signal obtained for random RNA. Probes are ranked by increasing t test p value.

**Table S2.** High-confidence sequence reads aligning to exons and introns from genes of interest. All reported exonic reads align uniquely to the spliced gene sequence (except for STX1A, which appears in two different genomic locations in the rn4 genome assembly). Intronic counts represent only genome-unique paired reads, with at least one read of an end pair anchored in non-repetitive sequence, and not overlapping

predicted coding regions as evidenced by homology or computational models. Reads overlapping splice junctions were found for Introns marked with an asterisk (\*): Adcy4 i11-e12, e12-i12, i12-e13; Gria3 e11-i11, i13-e14, i15-e16; Gria4 e13-i13; Grik1 i16-e17.

**Table S3.** ID elements found in candidate genes. All ID elements listed occur in the plus orientation relative to the host gene, whose strand is indicated in the “Strand” column. Sequencing evidence for each ID element is listed as “intron” = unique paired sequence reads are found in the containing intron; or “cis” = unique paired sequence reads span the ID element itself.

**Table S4.** Dendrite RNA pools are enriched in sequence reads aligning to ID elements. Sequence reads are listed for the three dendritic sequencing replicates. Number of reads with significant sequence similarity (by BLAST) to the ID element/BC1 5' hairpin, the BC1 3' domain, and the B2 SINE element are shown. Approximate genomic instance totals for each class of element (ID and B2) were based on RepeatMasker annotations and calculated by dividing the summed length of all genomic instances of each element by the typical length of the element (e.g., 74 nts for ID hairpins).

**Table S5.** Top-scoring RNA hairpins in retained introns with microRNA-like characteristics. For each hairpin, the following measures are shown: minimum free energy of the predicted structure (kcal/mol), minimum-free energy z-score value, self-containment index value, minimum e-value from a search against all miRNA RFAM

models, and the miRNA prediction results using CSHMM, MiPred, and Triplet-SVM classifiers (1 = miRNA).

**Table S1**

| Symbol  | Intron | Mean dendritic normalized signal | Mean background normalized signal | Difference | t statistic | p value |
|---------|--------|----------------------------------|-----------------------------------|------------|-------------|---------|
| CAMK2B  | 1      | -0.055                           | -0.624                            | 0.569      | 10.160      | 0.001   |
| STX1A   | 1      | 1.720                            | 0.929                             | 0.791      | 7.157       | 0.003   |
| SNCA    | 2      | 1.125                            | 0.547                             | 0.578      | 6.448       | 0.004   |
| GABRG3  | 5      | 0.034                            | -0.576                            | 0.609      | 6.383       | 0.004   |
| GABRD   | 8      | 0.640                            | 0.437                             | 0.203      | 5.047       | 0.008   |
| CACN1B  | 18     | 0.210                            | -0.068                            | 0.279      | 4.249       | 0.012   |
| ADCY4   | 11     | 0.320                            | 0.158                             | 0.162      | 3.841       | 0.016   |
| CAMK2B  | 3      | 0.053                            | -0.383                            | 0.436      | 3.152       | 0.026   |
| FMR1    | 1      | 0.735                            | 0.559                             | 0.176      | 2.527       | 0.043   |
| CDH1    | 15     | -0.596                           | -1.105                            | 0.510      | 2.419       | 0.047   |
| GRIN1   | 8      | 0.802                            | 0.653                             | 0.149      | 2.218       | 0.057   |
| GRIK1   | 1      | -0.250                           | -0.870                            | 0.620      | 2.167       | 0.059   |
| STX1A   | 9      | 1.403                            | 1.000                             | 0.403      | 2.163       | 0.060   |
| MAP2    | 4      | -0.151                           | -2.648                            | 2.497      | 2.087       | 0.064   |
| STX1B2  | 1      | 0.611                            | 0.468                             | 0.143      | 1.967       | 0.072   |
| CAMK2G  | 9      | 0.345                            | 0.232                             | 0.113      | 1.583       | 0.106   |
| GABRA4  | 1      | 0.444                            | 0.278                             | 0.167      | 1.577       | 0.106   |
| ADCY6   | 2      | 1.079                            | 0.846                             | 0.233      | 1.567       | 0.108   |
| CAMK2B  | 15     | 0.682                            | 0.225                             | 0.456      | 1.523       | 0.113   |
| GABRA4  | 8      | 0.338                            | 0.041                             | 0.297      | 1.448       | 0.122   |
| GRIA3   | 1      | 0.378                            | -0.037                            | 0.415      | 1.432       | 0.124   |
| CACN1B  | 45     | 0.327                            | 0.065                             | 0.262      | 1.309       | 0.141   |
| GRIA3   | 14     | -0.058                           | -0.217                            | 0.159      | 1.080       | 0.180   |
| SNCB    | 2      | 0.317                            | 0.204                             | 0.113      | 1.039       | 0.188   |
| GABBR1  | 6      | -0.026                           | -0.347                            | 0.321      | 0.989       | 0.198   |
| ALB     | 6      | 1.697                            | 1.488                             | 0.209      | 0.936       | 0.209   |
| CACNA1H | 5      | 0.002                            | -0.130                            | 0.132      | 0.626       | 0.288   |
| ADCY5   | 1      | 0.246                            | 0.220                             | 0.026      | 0.612       | 0.292   |
| KCND2   | 1      | -0.214                           | -0.305                            | 0.091      | 0.575       | 0.303   |
| ADCY2   | 1      | 0.615                            | 0.422                             | 0.193      | 0.490       | 0.329   |
| SNCG    | 4      | -0.207                           | -0.241                            | 0.034      | 0.414       | 0.353   |
| ADCY3   | 3      | 0.845                            | 0.713                             | 0.132      | 0.365       | 0.370   |
| CREB1   | 2      | -0.236                           | -0.315                            | 0.078      | 0.296       | 0.393   |
| GABBR1  | 21     | 0.273                            | 0.175                             | 0.098      | 0.286       | 0.397   |
| ADCY4   | 2      | 0.854                            | 0.808                             | 0.046      | 0.284       | 0.398   |
| ALB     | 1      | 0.066                            | 0.038                             | 0.028      | 0.274       | 0.401   |
| ADCY2   | 20     | -0.365                           | -0.378                            | 0.013      | 0.257       | 0.407   |
| GRIN1   | 1      | 0.654                            | 0.564                             | 0.091      | 0.221       | 0.420   |
| GABRD   | 1      | 0.133                            | 0.113                             | 0.020      | 0.105       | 0.461   |
| STX1B2  | 7      | 0.534                            | 0.545                             | -0.010     | -0.146      | 0.554   |
| ADCY6   | 1      | 0.235                            | 0.280                             | -0.045     | -0.177      | 0.565   |
| CACNA1H | 33     | -0.642                           | -0.592                            | -0.051     | -0.341      | 0.622   |
| FMR1    | 7      | -0.280                           | -0.180                            | -0.100     | -0.388      | 0.638   |
| SNCG    | 1      | 0.279                            | 0.327                             | -0.048     | -0.433      | 0.653   |
| ADCY5   | 3      | 0.468                            | 0.495                             | -0.027     | -0.567      | 0.695   |
| ADCY5   | 20     | 0.396                            | 0.438                             | -0.042     | -0.682      | 0.728   |
| KCND2   | 4      | 0.091                            | 0.121                             | -0.030     | -0.902      | 0.783   |
| SNCB    | 5      | 0.820                            | 0.958                             | -0.138     | -1.016      | 0.808   |
| CREB1   | 6      | 0.319                            | 0.808                             | -0.488     | -1.148      | 0.833   |
| STX1A   | 3      | 1.303                            | 1.590                             | -0.287     | -1.350      | 0.865   |
| GABRG3  | 9      | -0.448                           | -0.248                            | -0.200     | -1.374      | 0.868   |
| APP     | 17     | 0.113                            | 0.346                             | -0.234     | -1.443      | 0.878   |
| ADCY4   | 24     | 0.132                            | 0.279                             | -0.147     | -1.559      | 0.892   |
| GRIA4   | 16     | 0.094                            | 0.303                             | -0.209     | -1.563      | 0.892   |

|         |    |        |        |        |        |       |
|---------|----|--------|--------|--------|--------|-------|
| GRIA4   | 4  | -0.637 | -0.378 | -0.260 | -1.571 | 0.893 |
| CDH1    | 3  | -0.105 | 0.073  | -0.178 | -1.677 | 0.904 |
| STX1B2  | 4  | 0.023  | 0.305  | -0.282 | -1.712 | 0.907 |
| APP     | 6  | -0.062 | 0.034  | -0.096 | -1.795 | 0.915 |
| KCNA2   | 1  | 0.271  | 0.486  | -0.214 | -2.080 | 0.936 |
| GABRG3  | 2  | -0.620 | -0.473 | -0.147 | -2.086 | 0.936 |
| GRM7    | 1  | -0.059 | 0.405  | -0.465 | -2.608 | 0.960 |
| ADCY6   | 21 | -0.644 | -0.021 | -0.623 | -2.672 | 0.962 |
| CACN1B  | 1  | 0.304  | 0.594  | -0.290 | -2.884 | 0.968 |
| ADCY3   | 2  | 0.644  | 1.236  | -0.591 | -3.008 | 0.971 |
| CAMK2D  | 18 | -0.609 | 0.049  | -0.658 | -3.047 | 0.972 |
| GRIK1   | 3  | -0.036 | 0.206  | -0.242 | -3.654 | 0.982 |
| CDH1    | 1  | 0.321  | 0.706  | -0.385 | -4.716 | 0.991 |
| MAP2    | 3  | 0.331  | 0.713  | -0.382 | -5.537 | 0.994 |
| GRIN1   | 19 | 0.309  | 0.933  | -0.624 | -5.874 | 0.995 |
| GRIA4   | 2  | -0.350 | -0.015 | -0.335 | -7.342 | 0.997 |
| ADCY2   | 4  | -1.013 | -1.970 | 0.957  | 3.855  | 0.015 |
| CREB1   | 8  | -1.253 | -1.846 | 0.594  | 3.252  | 0.024 |
| CAMK2A  | 10 | -0.936 | -1.482 | 0.546  | 1.916  | 0.076 |
| MAP2    | 12 | -0.859 | -1.006 | 0.147  | 1.435  | 0.123 |
| GRIK1   | 16 | -0.787 | -1.064 | 0.277  | 1.176  | 0.162 |
| GABRA4  | 7  | -0.878 | -1.106 | 0.228  | 1.129  | 0.170 |
| GABRD   | 2  | -0.853 | -1.090 | 0.237  | 1.111  | 0.174 |
| CAMK2A  | 3  | -0.736 | -0.879 | 0.143  | 0.792  | 0.243 |
| CACNA1H | 1  | -0.892 | -1.013 | 0.122  | 0.756  | 0.252 |
| CAMK2A  | 1  | -0.864 | -0.922 | 0.058  | 0.583  | 0.300 |
| GABBR1  | 11 | -0.756 | -0.655 | -0.101 | -0.238 | 0.586 |
| SNCA    | 4  | -0.641 | -0.570 | -0.071 | -0.445 | 0.657 |
| CAMK2G  | 18 | -0.654 | -0.513 | -0.141 | -0.774 | 0.752 |
| APP     | 1  | -1.849 | -1.426 | -0.423 | -0.926 | 0.789 |
| CAMK2G  | 2  | -1.095 | -0.711 | -0.384 | -1.493 | 0.884 |
| ADCY3   | 21 | -1.028 | -0.500 | -0.529 | -1.758 | 0.912 |
| CAMK2D  | 4  | -1.157 | -0.643 | -0.514 | -2.420 | 0.953 |
| FMR1    | 15 | -1.040 | -0.585 | -0.454 | -3.242 | 0.976 |
| KCND2   | 2  | -1.387 | -0.703 | -0.683 | -3.389 | 0.979 |
| ALB     | 14 | -0.960 | -0.333 | -0.626 | -3.552 | 0.981 |
| GRIA3   | 4  | -1.402 | -0.950 | -0.452 | -3.619 | 0.982 |
| CAMK2D  | 1  | -1.314 | -0.558 | -0.756 | -4.257 | 0.988 |





**Table S3**

| Symbol  | Intron | Coord                    | Strand | ID            | Seq. evidence |
|---------|--------|--------------------------|--------|---------------|---------------|
| ADCY2   | i1     | chr17:4557075-4557148    | +      | ADCY2i1ID1    |               |
| ADCY2   | i13    | chr17:4923799-4923872    | +      | ADCY2i13ID1   | intron        |
| ADCY2   | i14    | chr17:4931390-4931463    | +      | ADCY2i14ID1   | intron        |
| ADCY2   | i3     | chr17:4679992-4680065    | +      | ADCY2i3ID1    |               |
| ADCY2   | i3     | chr17:4721539-4721612    | +      | ADCY2i3ID2    |               |
| ADCY2   | i3     | chr17:4820243-4820316    | +      | ADCY2i3ID3    |               |
| ADCY4   | i21    | chr15:33932416-33932489  | -      | ADCY4i21ID1   |               |
| ADCY5   | i1     | chr11:67398142-67398213  | -      | ADCY5i1ID1    | cis           |
| ADCY5   | i3     | chr11:67338681-67338754  | -      | ADCY5i3ID1    |               |
| APP     | i13    | chr11:24481873-24481946  | -      | APPi13D1      | cis           |
| APP     | i14    | chr11:24474905-24474978  | -      | APPi14D1      |               |
| CACNA1B | i31    | chr3:2915346-2915419     | -      | CACNA1Bi31ID1 | intron        |
| CAMK2A  | i2     | chr18:56897536-56897608  | +      | CAMK2Ai2ID1   |               |
| CAMK2B  | i1     | chr14:86712517-86712590  | -      | CAMK2Bi1ID1   | intron        |
| CAMK2B  | i3     | chr14:86667060-86667132  | -      | CAMK2Bi3ID1   |               |
| CAMK2D  | i2     | chr2:223879849-223879922 | +      | CAMK2Di2ID1   | intron        |
| CAMK2D  | i4     | chr2:224012159-224012231 | +      | CAMK2Di4ID1   | intron        |
| CAMK2D  | i7     | chr2:224038648-224038720 | +      | CAMK2Di7ID1   |               |
| CAMK2G  | i18    | chr15:3784885-3784955    | +      | CAMK2Gi18ID1  | cis           |
| CAMK2G  | i2     | chr15:3748334-3748403    | +      | CAMK2Gi2ID1   |               |
| CDH1    | i2     | chr19:36456777-36456850  | +      | CDH1i2ID1     | intron        |
| CDH1    | i2     | chr19:36488291-36488364  | +      | CDH1i2ID2     | intron        |
| FMR1    | i1     | chrX:154759680-154759747 | +      | FMR1i1ID1     | cis           |
| FMR1    | i2     | chrX:154764980-154765052 | +      | FMR1i2ID1     |               |
| GABRA4  | i2     | chr14:39058639-39058711  | +      | GABRA4i2ID1   |               |
| GABRG3  | i3     | chr1:108690876-108690948 | -      | GABRG3i3ID1   | intron        |
| GABRG3  | i5     | chr1:108287957-108288025 | -      | GABRG3i5ID1   | intron        |
| GABRG3  | i5     | chr1:108285219-108285291 | -      | GABRG3i5ID2   | intron        |
| GABRG3  | i5     | chr1:108273028-108273101 | -      | GABRG3i5ID3   | intron        |
| GABRG3  | i5     | chr1:108394161-108394234 | -      | GABRG3i5ID4   | intron        |
| GABRG3  | i6     | chr1:108223713-108223786 | -      | GABRG3i6ID1   |               |
| GRIA3   | i2     | chrX:3683750-3683823     | -      | GRIA3i2ID1    | intron        |
| GRIA3   | i4     | chrX:3569721-3569788     | -      | GRIA3i4ID1    |               |
| GRIA4   | i14    | chr8:985632-985705       | -      | GRIA4i14ID1   | intron        |
| GRIA4   | i14    | chr8:971449-971519       | -      | GRIA4i14ID2   | intron        |
| GRIA4   | i4     | chr8:1236057-1236129     | -      | GRIA4i4ID1    | cis           |
| GRIA4   | i6     | chr8:1088993-1089066     | -      | GRIAi6ID1     |               |
| GRIA4   | i7     | chr8:1055625-1055698     | -      | GRIA4i7ID1    | intron        |
| GRIK1   | i1     | chr11:27943131-27943204  | -      | GRIK1i1ID1    | intron        |
| GRIK1   | i1     | chr11:27913623-27913697  | -      | GRIK1i1ID2    | intron        |
| GRIK1   | i1     | chr11:28081118-28081190  | -      | GRIK1i1ID3    | intron        |
| GRIK1   | i1     | chr11:28044738-28044811  | -      | GRIK1i1ID4    | intron        |
| GRIK1   | i1     | chr11:28098620-28098693  | -      | GRIK1i1ID5    | intron        |

|        |     |                          |   |             |        |
|--------|-----|--------------------------|---|-------------|--------|
| GRIK1  | i16 | chr11:27709224-27709296  | - | GRIK1i16ID1 | intron |
| GRIK1  | i6  | chr11:27814404-27814476  | - | GRIK1i6ID1  |        |
| GRIN1  | i4  | chr3:3471203-3471276     | - | GRIN1i4ID1  |        |
| GRIN1  | i8  | chr3:3462386-3462457     | - | GRIN1i8ID1  | intron |
| GRIN1  | i8  | chr3:3461694-3461767     | - | GRIN1i8ID2  | intron |
| GRM7   | i1  | chr4:146624192-146624265 | + | GRM7i1ID1   | intron |
| GRM7   | i1  | chr4:146736661-146736734 | + | GRM7i1ID2   | intron |
| GRM7   | i1  | chr4:146746191-146746264 | + | GRM7i1ID3   | intron |
| GRM7   | i1  | chr4:146760671-146760744 | + | GRM7i1ID4   | intron |
| GRM7   | i1  | chr4:146937318-146937390 | + | GRM7i1ID5   | intron |
| GRM7   | i1  | chr4:146951304-146951377 | + | GRM7i1ID6   | intron |
| GRM7   | i1  | chr4:146433109-146433182 | + | GRM7i1ID7   | intron |
| GRM7   | i2  | chr4:146972743-146972815 | + | GRM7i2ID1   |        |
| GRM7   | i5  | chr4:147097472-147097544 | + | GRM7i5ID1   | intron |
| GRM7   | i6  | chr4:147204899-147204971 | + | GRM7i6ID1   | intron |
| GRM7   | i6  | chr4:147222137-147222210 | + | GRM7i6ID2   | intron |
| KCND2  | i1  | chr4:47841144-47841217   | + | KCND2i1ID1  | intron |
| KCND2  | i1  | chr4:47972539-47972610   | + | KCND2i1ID2  | intron |
| KCND2  | i1  | chr4:47998363-47998436   | + | KCND2i1ID3  | intron |
| KCND2  | i1  | chr4:48009814-48009886   | + | KCND2i1ID4  | intron |
| KCND2  | i1  | chr4:47642184-47642253   | + | KCND2i1ID6  | intron |
| MAP2   | i10 | chr9:65246459-65246531   | + | MAP2i10ID1  | intron |
| MAP2   | i10 | chr9:65249684-65249754   | + | MAP2i10ID2  | cis    |
| MAP2   | i11 | chr9:65253115-65253188   | + | MAP2i11ID1  |        |
| SNCA   | i2  | chr4:89713754-89713825   | - | SNCAi2ID1   |        |
| SNCG   | i3  | chr16:10028853-10028926  | - | SNCGi3ID1   |        |
| STX1B2 | i4  | chr1:187098603-187098671 | - | STX1B1i4ID1 |        |

**Table S4**

| <b>Dendrite sample</b>                  | <b>D1</b>  | <b>D2</b>  | <b>D3</b>  |
|-----------------------------------------|------------|------------|------------|
| Total number of reads (single)          | 25,923,420 | 25,428,726 | 21,647,526 |
| Num. reads aligning:                    |            |            |            |
| ID hairpin (74 nt)                      | 101,981    | 109,919    | 75,227     |
| BC1 3' domain (78 nt)                   | 0          | 0          | 0          |
| B2 5' portion (74nt)                    | 11,793     | 8,603      | 11,143     |
| Num. aligned reads per genomic instance |            |            |            |
| ID (161,321 genomic instances)          | 0.623      | 0.681      | 0.466      |
| B2 (352,447 genomic instances)          | 0.033      | 0.024      | 0.032      |
| Fold enrichment ID > B2                 | 18.9       | 27.9       | 14.7       |

**Table S5**

| <b>Symbol</b> | <b>i</b> | <b>Genomic coord</b>         | <b>MFE</b> | <b>MFEZ</b> | <b>SC</b> | <b>RFAM</b> | <b>CSHMM</b> | <b>MiPred</b> | <b>Triplet</b> |
|---------------|----------|------------------------------|------------|-------------|-----------|-------------|--------------|---------------|----------------|
| GABRG3        | i5       | chr1:108,421,636-108,421,725 | -44.3      | -6.59       | 0.99      | 2.7E-8      | 1            | 1             | 1              |
| GRIK1         | i1       | chr11:28,068,838-28,068,904  | -27.4      | -5.96       | 0.98      | 3.1E-3      | 1            | 1             | 1              |
| FMR1          | i1       | chrX:154,761,229-154,761,378 | -41.5      | -3.55       | 0.92      | 1.5E-3      | 1            | 0             | 0              |
| CAMK2B        | i3       | chr14:86,668,207-86,668,312  | -54.3      | -3.43       | 0.95      | 8.1E-3      | 1            | 0             | 0              |

## Supplemental Text

**PCR confirmation of intronic loci presence in dendrites.** As an additional means of confirming the presence of retained intronic sequences within dendritically localized transcripts, dendritic cDNA was used as template material for PCR reactions. Select primer pairs used to generate sequences for microarray printing were used to amplify sequences from cDNA made from isolated dendrites. Bands were detected using this approach, subcloned and sequence verified as the intronic target sequences for all introns queried (Figure S1C), except for those in STX1A. The PCR products confirm that the target intronic sequences are part of the transcripts bearing the coding sequence for target genes, as the 5' primer lies within the upstream exon in all cases.

**Verifying candidate intronic retention loci.** To confirm that the candidate retained introns were not unannotated alternate exons or overlapping genes, we analyzed each retained intronic locus using publicly available annotations and base composition properties. Some of the candidate intronic loci were in fact found to have high sequence similarity to annotated exons in related species using RefSeq and Ensembl, or were spanned by N-SCAN or Genescan predicted exons; these were removed from consideration. However, a vast majority of detected CIRTs showed no detectable conservation or gene prediction signals in the retained intronic region. We also analyzed the distributions of open-reading frame (ORF) lengths among candidate CIRTs of interest and further eliminated candidates that had unusually long stop codon-free

regions in any reading frame, using a cutoff empirically determined by the stop codon characteristics of known coding sequence. In all, only six introns were eliminated from consideration on the basis of any of these characteristics: ADCY2i21, ADCY6i1, and GRIA4i10 due to annotated coding evidence; and ADCY5i1, ADCY5i8, and CAMK2Di13 due to long ORFs.

We also sought to ensure that the observed intronic read coverage was in fact due to selective intron sequence retention and not due to RNA sample contamination. First, we found that reads mapping to intergenic regions are generally not present in the sequencing data. For our candidate CIRTS, we found a highly significant enrichment of intronic read coverage as compared to neighboring intergenic regions of equal length ( $p < 2.2E-16$  by the Binomial Proportion Test), indicating that read alignments within the gene boundaries do not arise from genomic DNA contamination.

We also reasoned that if pre-mRNAs are present in the RNA extracts, all introns in a gene should be represented roughly proportionally in the sequencing data; however, among the genes with strong evidence of exonic sequence coverage (at least 20 reads aligning to exons), only 15 percent of the introns show evidence for retention. There is a high degree of variability in the number of introns with retention evidence across our genes of interest, which is not positively correlated with the number of introns in the gene ( $p = 0.93$ , Pearson's correlation). Similarly, there is no correlation between intron position in the gene architecture and retention, as roughly equal numbers of first and last introns were retained (five versus seven), and there is no significant rank correlation between degree of read coverage per intron and intron

position in the gene for any of the candidate CIRTs ( $0.080 < p < 0.99$ , Spearman's correlation).

**Measuring the prevalence of ID elements in dendritic RNA pools.** We analyzed the entire pool of sequencing data from the dendrite samples and found a pronounced enrichment in reads that contain ID-element sequence. Compared to transposable elements belonging to the SINE B2 element family, which occur approximately 2.2 times more frequently than the ID element in the rat genome as annotated by RepeatMasker, ID elements occur on average 9.4 times more often in the sequence reads, implying a 20-fold enrichment in ID element sequence in the dendritic RNA pools (Table S4). These ID-related sequence reads do not arise from BC1 RNAs, since the comparably-sized BC1 3' domain does not appear at all in the sequencing data. These results suggest that a large number of dendritically localized transcripts contain ID element sequences.

***In situ* hybridization control experiments.** For *in situ* hybridization studies, all cultures were immunostained with antibodies to MAP2 protein to confirm dendrito-somatic regions of neurons, and sense strand probes were used as nucleotide compositional controls (Figure S2). Additionally, we performed controls recommended by the Allen Mouse Brain Atlas (<http://mouse.brain-map.org/documentation/index.html>). We used different detection systems (DAB and Quantum Dot), tested for background signal in ISH's performed without probes, and repeated the ISH studies on distinct cultures from

different dates of harvesting and different litters (data not shown).

To ensure that exogenous transcript localization patterns were not the result of association with translational machinery in the cytoplasm, we also looked for EGFP protein expression in cells transfected with the ID-EGFP constructs. We found that the ID-containing constructs engage the translational machinery, producing detectable levels of EGFP distributed throughout the cytoplasm (Figure S3D).

**Quantifying differences in dendritic *in situ* hybridization signals between experimental and control cells.** For each cell under consideration, signal intensity was measured along the length of the dendrites, out to a distance of approximately 50  $\mu\text{m}$  from the soma, and normalized to set the highest intensity pixel to 1. The RNA intensities were pooled in 8  $\mu\text{m}$  intervals and paired t-tests were carried out to assess the significance of the difference between the test probe and control EGFP probe within each interval. Since the resulting set of t-tests may not be independent due to shared residuals from a gradient-like generating process along the dendrites, we carried out a conservative Bonferroni correction for non-independent multiple tests. All test probes showed significantly greater signal intensity along the length of the dendrites compared to the EGFP control using a Fisher's combined statistic for Bonferroni-corrected t-test p-values from each interval. Fisher's combined p statistics and probabilities of the Fisher's combined p value are as follows -- CAMK2B*i*3ID1: 71.99,  $p = 1.36\text{E-}10$ ; FMRI1ID1: 89.02,  $p = 7.63\text{E-}14$ ; GABRG3*i*5ID2: 74.19,  $p = 5.24\text{E-}11$ ; GRIK1*i*1ID4: 74.19,  $p = 5.24\text{E-}11$ ). Similar calculations were performed for the competition and



cross-competition assays. For the competition assays, *in situ* signal for intron-containing transcripts in the absence of competitor construct was compared to signal in the presence of competitor constructs, yielding the following Fisher's statistics and p values – CAMK2Bi3: 64.04, p = 4.10E-9; FMR1i1: 67.42, p = 9.69E-10; GABRG3i5: 64.36, p = 3.58E-9; GRIK1i1: 51.55, p = 7.46E-7. For the cross-competition assays, *in situ* signal was again compared in the absence and presence of competitor constructs, yielding the following Fisher's statistics and p values – CAMK2Bi3 vs FMR1ID1: 44.51, p = 1.25E-5; FMR1i1 vs CAMK2Bi3ID1: 78.03, p = 9.8E-12.

**Diffusion modeling of dendritic *in situ* intensities.** In order to compare our *in situ* results to a non-specific diffusion model, we tested the differential gradient by fitting the entire probe intensity curve to a negative hyperbolic function of the form  $I = c - \frac{sd}{g+d}$  where  $I$  represents probe intensity and  $d$  represents distance from soma. The parameters  $c$  and  $s$  represent translation and scale of the curve with  $(c - s)$  forming the asymptote of the curve. The parameter  $g$  represents the steepness of the curve; i.e., the steepness of the gradient, and is therefore the parameter of interest. The ISH signals for control EGFP probes (n=8) and test probes (n=10, each) were fitted using a nonlinear least-squares fitting procedure (R statistical package). For the EGFP control, the 95% confidence interval for the parameter  $g$  is 1.63+/-0.241, while for the test probes, the intervals are CAMK2B = 2.32+/-0.420, FMR1 = 4.94+/-1.133, GABRG3 = 3.56+/-0.499, GRIK1 = 4.96+/-0.866. Thus, EGFP forms a significantly steeper gradient along the dendrites than any of the four quantified test probe ISHs, suggesting more active

transport of the mRNA corresponding to the test probes. It should be noted that the parameter estimate  $g$  provides an assessment of the RNA gradient controlling for the expression levels (computationally rescaling the expression levels results in the same  $g$  estimate; data not shown). In effect, fitting a hyperbolic curve and then testing the steepness parameter establishes the spatial pattern as a self-control that is invariant of expression levels or probe specific effects.

**ID element mutations block dendritic targeting capacity.** We introduced two separate mutations in wild-type ID element sequences to verify that the BC1-like targeting motifs conferred targeting capacity: deletion of the uracil at position 22, which eliminates a bulge in the predicted secondary structure; and truncation of the basal stem by deleting seven nucleotides from each end of the ID element (positions 1-7 and 68-74) leaving the rest of the ID element and its flanking intronic sequence intact. Both of these mutations in 5' BC1 significantly disrupted its dendritic localization in neurons (Muslimov et al., 2006), and we see similar results when these same mutations are incorporated into intronic ID elements, as dendritic localization of exogenous ID-EGFP transcripts is inhibited (Figure 2B). Both mutations decreased transgene mRNA targeting to dendrites by nearly the same extent.

## Supplemental Experimental Procedures

**Microarray preparation** Thirty-three dendritic genes were selected for investigation.

RefSeq gene models were used, as shown in the following table:

| RefSeq ID | Symbol  | Description                                                         | Strand | Chr | Start     | End       |
|-----------|---------|---------------------------------------------------------------------|--------|-----|-----------|-----------|
| NM_031007 | ADCY2   | ADENYLATE CYCLASE 2                                                 | +      | 17  | 4543490   | 5040433   |
| NM_130779 | ADCY3   | ADENYLATE CYCLASE 3                                                 | +      | 6   | 27118400  | 27202275  |
| NM_019285 | ADCY4   | ADENYLATE CYCLASE 4                                                 | -      | 15  | 33930534  | 33946315  |
| NM_022600 | ADCY5   | ADENYLATE CYCLASE 5                                                 | -      | 11  | 67290968  | 67437468  |
| NM_012821 | ADCY6   | ADENYLATE CYCLASE 6                                                 | -      | 7   | 137339933 | 137360020 |
| NM_134326 | ALB     | ALBUMIN                                                             | -      | 14  | 19126965  | 19142199  |
| NM_019288 | APP     | AMYLOID BETA (A4) PRECURSOR PROTEIN                                 | -      | 11  | 24457855  | 24693851  |
| NM_147141 | CACNA1B | CALCIUM CHANNEL, VOLTAGE-DEPENDENT, N TYPE, ALPHA 1B SUBUNIT        | -      | 3   | 2873391   | 3039747   |
| NM_153814 | CACNA1H | CALCIUM CHANNEL, VOLTAGE-DEPENDENT, T TYPE, ALPHA 1H SUBUNIT        | -      | 10  | 14621372  | 14679051  |
| NM_012920 | CAMK2A  | CALCIUM/CALMODULIN-DEPENDENT PROTEIN KINASE II ALPHA SUBUNIT        | +      | 18  | 56879247  | 56948537  |
| NM_021739 | CAMK2B  | CALCIUM/CALMODULIN-DEPENDENT PROTEIN KINASE II BETA SUBUNIT         | -      | 14  | 86634690  | 86721261  |
| NM_012519 | CAMK2D  | CALCIUM/CALMODULIN-DEPENDENT PROTEIN KINASE II, DELTA               | +      | 2   | 223840650 | 224108082 |
| NM_133605 | CAMK2G  | CALCIUM/CALMODULIN-DEPENDENT PROTEIN KINASE II GAMMA                | +      | 15  | 3729433   | 3786057   |
| NM_031334 | CDH1    | CADHERIN 1                                                          | +      | 19  | 36442693  | 36512091  |
| NM_031017 | CREB1   | CAMP RESPONSIVE ELEMENT BINDING PROTEIN 1                           | +      | 9   | 63170785  | 63234725  |
| NM_052804 | FMR1    | FRAGILE X MENTAL RETARDATION SYNDROME 1 HOMOLOG                     | +      | X   | 154756031 | 154793782 |
| NM_031028 | GABBR1  | GAMMA-AMINOBUTYRIC ACID (GABA) B RECEPTOR 1                         | -      | 20  | 1553313   | 1582398   |
| NM_080587 | GABRA4  | GAMMA-AMINOBUTYRIC ACID (GABA-A) RECEPTOR, SUBUNIT ALPHA 4          | +      | 14  | 39047461  | 39122526  |
| NM_017289 | GABRD   | GAMMA-AMINOBUTYRIC ACID A RECEPTOR, DELTA                           | -      | 5   | 172203065 | 172214960 |
| NM_024370 | GABRG3  | GAMMA-AMINOBUTYRIC ACID (GABA) A RECEPTOR, SUBUNIT GAMMA 3          | -      | 1   | 108189311 | 108821051 |
| NM_032990 | GRIA3   | GLUTAMATE RECEPTOR, IONOTROPIC, AMPA3 (ALPHA 3)                     | -      | X   | 3454606   | 3719276   |
| NM_017263 | GRIA4   | GLUTAMATE RECEPTOR, IONOTROPIC, 4                                   | -      | 8   | 957190    | 1438021   |
| NM_017241 | GRIK1   | GLUTAMATE RECEPTOR, IONOTROPIC, KAINATE 1                           | -      | 11  | 27703875  | 28106450  |
| NM_017010 | GRIN1   | GLUTAMATE RECEPTOR, IONOTROPIC, N-METHYL D-ASPARTATE 1              | -      | 3   | 3453784   | 3480381   |
| NM_031040 | GRM7    | GLUTAMATE RECEPTOR, METABOTROPIC 7                                  | +      | 4   | 146332578 | 147270224 |
| NM_012970 | KCNA2   | POTASSIUM VOLTAGE-GATED CHANNEL, SHAKER-RELATED SUBFAMILY, MEMBER 2 | +      | 2   | 202560175 | 202564305 |
| NM_031730 | KCND2   | POTASSIUM VOLTAGE GATED CHANNEL, SHAL-RELATED FAMILY,               | +      | 4   | 47541787  | 48047906  |

|           |        | MEMBER 2                         |   |    |           |           |
|-----------|--------|----------------------------------|---|----|-----------|-----------|
| NM_013066 | MAP2   | MICROTUBULE-ASSOCIATED PROTEIN 2 | + | 9  | 65174379  | 65255995  |
| NM_019169 | SNCA   | SYNUCLEIN, ALPHA                 | - | 4  | 89613731  | 89722807  |
| NM_080777 | SNCB   | SYNUCLEIN, BETA                  | + | 17 | 15907598  | 15915704  |
| NM_031688 | SNCG   | SYNUCLEIN, GAMMA                 | - | 16 | 10025979  | 10030513  |
| NM_053788 | STX1A  | SYNTAXIN 1A (BRAIN)              | - | 12 | 22737113  | 22765064  |
| NM_012700 | STX1B2 | SYNTAXIN 1B2                     | - | 1  | 187089182 | 187108643 |

Fragments were amplified using forty rounds of PCR with an annealing temperature of 50°C. The template used was rat genomic DNA isolated from rat liver. 1ug of each of 96 PCR products were submitted to the University of Pennsylvania Microarray Facility for printing on Corning UltraGap slides. These samples were dried and resuspended in 10ul of Corning Spotting Buffer. 1nl of each sample was then denatured and printed in each spot on individual slides and cross-linked using ultra-violet light for immobilization. All PCR products were subcloned and confirmed by sequencing prior to array printing. The following probe sequences were printed:

| RefSeq ID | Symbol  | Intron | Intron length | Probe length | Sense primer       | Antisense primer     |
|-----------|---------|--------|---------------|--------------|--------------------|----------------------|
| NM_031007 | ADCY2   | 1      | 15927         | 417          | CTGCTAGCCGTCTTCTTC | TTTGCCAAAGCAGCCTGT   |
| NM_031007 | ADCY2   | 4      | 4857          | 412          | TCTGTATGTCAAACGACA | TGGAATGCACTGGCTTCA   |
| NM_031007 | ADCY2   | 20     | 1700          | 486          | CTGAATGAGATCATTGCT | TGGCATTGGCCAGAGACC   |
| NM_130779 | ADCY3   | 2      | 37523         | 449          | GAGCTAGAAGGGATGCAG | GGGCAGACAGGATCTCCA   |
| NM_130779 | ADCY3   | 3      | 26352         | 480          | ATGAATCTGGAGGAGCAG | ACCCATTACCCACACA     |
| NM_130779 | ADCY3   | 21     | 399           | 396          | GAATCCACAGGGGTCATG | GCCAGGATGGTAGGAAAGAA |
| NM_019285 | ADCY4   | 2      | 1452          | 387          | CTGCCCGCCGTCGCCTGG | AGCCCCACATTCCTCAAAT  |
| NM_019285 | ADCY4   | 11     | 2612          | 424          | AGTCCTGCATCCACATCC | GCCCTGCCCTAGCTTCAT   |
| NM_019285 | ADCY4   | 24     | 279           | 287          | ACTCGTTCAACAACCTCC | TGGGGAGGCATGCTAGAG   |
| NM_022600 | ADCY5   | 1      | 90496         | 403          | AACGCCAGGACAGTTT   | TTCAGGAGGGGATGGCTA   |
| NM_022600 | ADCY5   | 3      | 15753         | 451          | GATTACATCCAGAAACA  | GTGGAGGCGAAGTGTGCT   |
| NM_022600 | ADCY5   | 20     | 1031          | 389          | GACAGCACTGGGGTGCCT | GGCCAGGAGAAGTGAAG    |
| NM_012821 | ADCY6   | 1      | 5953          | 471          | CGTGGCCGATCCGGTTC  | ACAAGCGCCACTGTTCT    |
| NM_012821 | ADCY6   | 2      | 2717          | 389          | AACAATGGTGACCCCTTC | GGCCATGGTGGGTTACAA   |
| NM_012821 | ADCY6   | 21     | 193           | 215          | GACAGCACAGGATTCCT  | TGAGAGGGGAGCCTGCTT   |
| NM_134326 | ALB     | 1      | 703           | 498          | TTTCCAGGGGTGTGTTTC | GCATTCAAACCAAGACG    |
| NM_134326 | ALB     | 6      | 1518          | 489          | GAGATTTGGAGAGAGAGC | AAGGCCCTGGGTTTCAGTC  |
| NM_134326 | ALB     | 14     | 1061          | 381          | CTTAGCCTAAACACATCA | GGTTTCAGCTTCATTAGAGG |
| NM_019288 | APP     | 1      | 52131         | 405          | TGGCCGCCTGGACGGTTC | TGAGACACTGCGCTTTCCG  |
| NM_019288 | APP     | 6      | 35426         | 490          | CCACTGAGTCTGTGGAGG | CCAGCCCAGTGAATGACC   |
| NM_019288 | APP     | 17     | 5628          | 424          | TACACATCCATCCATCAT | CAGGGCCCAACAAAACA    |
| NM_147141 | CACNA1B | 1      | 880           | 466          | CAAATATGCTAAGCGCAT | CCTGCAACCACACAGCAC   |
| NM_147141 | CACNA1B | 18     | 6129          | 406          | ATGTCTGCTGCCAACATC | GGCTGGGCTGCACTAGAA   |
| NM_147141 | CACNA1B | 45     | 476           | 405          | GCGGCACTAGAGCCAGGA | AGGCCAAATGGAGGGGAAG  |

|           |         |    |        |     |                        |                        |
|-----------|---------|----|--------|-----|------------------------|------------------------|
| NM_153814 | CACNA1H | 1  | 34322  | 477 | CAGCTGGTGCCTCCGACT     | TCCGCGGAGAATAAGGA      |
| NM_153814 | CACNA1H | 5  | 1331   | 427 | CCGATGCTTCCTGGACAG     | CTCCACCCAGGCTCCT       |
| NM_153814 | CACNA1H | 33 | 669    | 406 | CTGAGTCTCTCACGGATA     | GGACCCAGGTCACCTCT      |
| NM_012920 | CAMK2A  | 1  | 15908  | 454 | AGAGTACCAGCTCTTCGA     | GCGGGGGTGAAGTCTCTC     |
| NM_012920 | CAMK2A  | 3  | 14909  | 429 | GAGGGGCACCACTACCTT     | TCCCATGTGCTCCTGTCC     |
| NM_012920 | CAMK2A  | 10 | 4347   | 429 | TGGACTTTCATCGATTCT     | ACTGGGCATCTGGGATGA     |
| NM_021739 | CAMK2B  | 1  | 35619  | 411 | CGAGTACCAGCTATACGA     | GGCTAGGACCCGCCCTTC     |
| NM_021739 | CAMK2B  | 3  | 8295   | 424 | TCTGCCGCTGCTGAAGC      | CATGGCTACCAGGGAAGG     |
| NM_021739 | CAMK2B  | 17 | 6677   | 392 | ACACAACCATAGAGGACG     | ATCACTGGCAGGGCTCAG     |
| NM_012519 | CAMK2D  | 1  | 1579   | 468 | CGAGTATCAGCTCTTCGA     | TCGGCATCGATAAACAAGG    |
| NM_012519 | CAMK2D  | 4  | 43278  | 491 | AGAGGGCTTCATTACTT      | AGCGCTAGGCAGTCATGC     |
| NM_012519 | CAMK2D  | 18 | 1157   | 468 | TCGTTCCGGGTCCTCCAAC    | CCCCCTTGTCTCTTTCCA     |
| NM_133605 | CAMK2G  | 2  | 7736   | 411 | TATGCCGACTTCTGAAAC     | AGTGCGCAGGACACTTCC     |
| NM_133605 | CAMK2G  | 9  | 3744   | 440 | GACCAGGCTCTCAAGCAC     | GAGGTCTCGGAACTCAGC     |
| NM_133605 | CAMK2G  | 18 | 1505   | 444 | TGGATTTCCATAAGTTTT     | TCGATGTCCAGGGTGTCC     |
| NM_031334 | CDH1    | 1  | 750    | 419 | AGCTTCTCCGCGCTCCTG     | TACGGTCCCTCCCTCACA     |
| NM_031334 | CDH1    | 3  | 3930   | 405 | GGCCACCACCACCACCGG     | GGGGTTGTCGTCAGAGA      |
| NM_031334 | CDH1    | 15 | 1726   | 390 | CCTGATGAAATCGGGAAC     | GAGCTGGCCGATTCAAGA     |
| NM_031017 | CREB1   | 2  | 7008   | 393 | GCCCAGCCACAGATTGCC     | ACACCTTCAGGTCCCAAAA    |
| NM_031017 | CREB1   | 6  | 3999   | 438 | CGATTTACCAAACACTAGA    | CATGCAGGCACACACAGA     |
| NM_031017 | CREB1   | 8  | 21931  | 481 | AAAGAGGAGAGGTTGCTCT    | TGCATAAAATGCAAAAGAAAG  |
| NM_052804 | FMR1    | 1  | 8022   | 466 | GTGCGGGCTCCAAATGGC     | AGCCCAAAATCCGAACC      |
| NM_052804 | FMR1    | 7  | 2108   | 457 | ACTGAGAAATGAAGAAGCCAGT | GCCTCTGGCAGGAATCTG     |
| NM_052804 | FMR1    | 15 | 4185   | 439 | AAAGGAAGAACAACATGAT    | GCTCTTAGTAAAGGTGCCTGGA |
| NM_031028 | GABBR1  | 6  | 2933   | 467 | AGCTCAAGCTTATCCACC     | CAGAATCAGGCAGCCTTACC   |
| NM_031028 | GABBR1  | 11 | 5346   | 461 | CCTGCCAACACCCGAAGC     | TGAAGCAACCCCTGAAG      |
| NM_031028 | GABBR1  | 21 | 105    | 296 | ATCACTCTGGTTGTGCTC     | TGTTTGTACCCGCACACC     |
| NM_080587 | GABRA4  | 1  | 424    | 399 | CCTCCTGCACGTCTGTG      | ACAGGTGGAAAGGGATTGC    |
| NM_080587 | GABRA4  | 7  | 8278   | 434 | AGTCTGTTCCAGCCAGAA     | GCAGTCGGCTGAGACTTTG    |
| NM_080587 | GABRA4  | 8  | 42313  | 424 | AAGGAAAAACATACAGAA     | GGGTCATTCTGGCTGAGG     |
| NM_017289 | GABRD   | 1  | 7764   | 474 | GCTGTGCACGCAGCCGCA     | ACTCACGCAAGGGCAGAC     |
| NM_017289 | GABRD   | 2  | 309    | 326 | ACGCCCGAAACTTCCGAC     | GGCCTGCTAGCGTTCTGT     |
| NM_017289 | GABRD   | 8  | 273    | 301 | AAGGTCAAGGTACGAAG      | CAGAGAGTGGGCAGGAG      |
| NM_024370 | GABRG3  | 1  | 4902   | 401 | CCTCTGCCTGTTCTCGGG     | CTGGGTCCGGAGGTTTCT     |
| NM_024370 | GABRG3  | 5  | 188354 | 469 | CGCATGCCTGCCCTTTGA     | TGGTCTCCTTGTGGAATGAA   |
| NM_024370 | GABRG3  | 9  | 5156   | 436 | CCTGATCGAATAAGCCTT     | AGACGTATGGGCTGGAGAAG   |
| NM_032990 | GRIA3   | 1  | 1150   | 447 | ACGGAGGATTCCTCAACA     | CCCAGGTTATGCGTCTCT     |
| NM_032990 | GRIA3   | 4  | 28342  | 411 | GTGCAAGGATTAACACA      | CCTGTCCAGCCTGCCTAA     |
| NM_032990 | GRIA3   | 14 | 2560   | 402 | GAATGTGGAGCCAAGGAC     | CTGTACAGCTGGATCTTTTT   |
| NM_017263 | GRIA4   | 2  | 1151   | 489 | TGGGAGCCTTTCCAAGCA     | ACTGGCAAGGCAACAAGG     |
| NM_017263 | GRIA4   | 4  | 151900 | 398 | GTTTTGCTTCTCCTGTATG    | CACAAAGCCTGTTTGTCTGAG  |
| NM_017263 | GRIA4   | 16 | 2697   | 417 | AAGTCCAGGGCAGAGGCG     | CAATTTTAGGGAAATCATGCTG |
| NM_017241 | GRIK1   | 1  | 243354 | 466 | CTCAGACTCCCTCAAG       | GGCTTCCAGCTGCTTTTC     |
| NM_017241 | GRIK1   | 3  | 17589  | 447 | CAGTGACGGTGGTGTATG     | CCCTTCCCAAGGAATGT      |
| NM_017241 | GRIK1   | 16 | 18626  | 417 | AAATCACGGAAGAACAAT     | TGTATCCTGAAGGGCTGGT    |
| NM_017010 | GRIN1   | 1  | 1359   | 414 | TCAGTGTGTGAGGACCTC     | CTGCTTGTCTTGGCACCT     |
| NM_017010 | GRIN1   | 8  | 4252   | 421 | CGAGGATACCAGATGTCC     | TGCAAATCAGGCTGAGGA     |
| NM_017010 | GRIN1   | 19 | 1911   | 396 | TTCAAGAGACGTAGGTCC     | AGGGGCAACCTGGGATAG     |
| NM_031040 | GRM7    | 1  | 618843 | 473 | ATGGTAAGCAACATCTTG     | TGGCTTAGGCATGGGAAG     |
| NM_012970 | KCNA2   | 1  | 1402   | 447 | ACATGGAGGCTCGGGTAC     | CCCAGCCAAGTGGAAAAA     |
| NM_031730 | KCND2   | 1  | 486424 | 492 | GTACACCATCGTCACCAT     | GGCAAACCTAGACTTCAAACA  |
| NM_031730 | KCND2   | 2  | 11469  | 501 | CAACGAGCCGGACAAACGA    | GCCCGATTCTAAGGGATAAA   |
| NM_031730 | KCND2   | 4  | 2607   | 437 | CACCTGCTTCACTGCCTG     | CCCATCCCTCTTTGCTT      |
| NM_013066 | MAP2    | 3  | 1945   | 485 | ACAAGGATCAGCCTGCAG     | TGGGAAATGGCAAGGCTA     |
| NM_013066 | MAP2    | 4  | 10939  | 461 | CATCAGAACAAACAGCTG     | AGGGCTGGGGGAAGTTCT     |
| NM_013066 | MAP2    | 12 | 480    | 408 | CACCATGTACCTGGAGGT     | CCCTCCTTCCCGTTTGTG     |
| NM_019169 | SNCA    | 2  | 10738  | 399 | GGAAGACAAAAGAGGGCG     | TCTTTGGGCTGCACCTC      |
| NM_019169 | SNCA    | 4  | 89732  | 469 | GGTTTTGTCAAGAAGGAC     | AGCCCAGTTTGCAAAATCAT   |
| NM_080777 | SNCB    | 2  | 2922   | 439 | AGAAGACCAAGGAAGGCG     | TCATACCCGCTTCAGAG      |
| NM_080777 | SNCB    | 5  | 379    | 401 | GAAGGGGAAAGTTACGAG     | AGGGAGGGGTGGAACAGA     |
| NM_031688 | SNCG    | 1  | 762    | 404 | AGAAGACCAAGGAAGGGG     | AGGTGGGGTCTGTAGCC      |
| NM_031688 | SNCG    | 4  | 237    | 215 | GAGGCCAAAGAGCAAGAG     | ATTCACAGGCCACAACCT     |
| NM_053788 | STX1A   | 1  | 12905  | 502 | ATGAAGGACCGAACCCAG     | TGATGAGGAGCCCCAAGA     |

|           |        |   |      |     |                    |                     |
|-----------|--------|---|------|-----|--------------------|---------------------|
| NM_053788 | STX1A  | 3 | 3564 | 536 | CATCCTGGCCTCCCCGAA | GGTAGCCTGCTTGGTCAGA |
| NM_053788 | STX1A  | 9 | 828  | 427 | GCCGTCAAGTACCAGAGC | GGCGTGGCTCAGTGGTAG  |
| NM_012700 | STX1B2 | 1 | 8126 | 407 | ATGAAGGATCGGACTCAG | CAGTAACCACCCCTCCA   |
| NM_012700 | STX1B2 | 4 | 3284 | 479 | CGGCAAACAAGGTCCGGT | CATTTGCTGAGCCACCT   |
| NM_012700 | STX1B2 | 7 | 2455 | 473 | AGCGGGAAGCTGGCCATC | GGGCTGTGGGTCATTGTC  |

Following three rounds of aRNA (Miyashiro et al., 1994), labeled single stranded cDNA was generated by incorporation of amino-allyl labeled dUTP and conjugation with Cy3. Labeled material from dendrites was hybridized to our custom microarrays and screened for positives.

Slides were blocked (pre-hybridized) at 42°C for 3 hours in 1% bovine serum albumin (BSA), 1% sodium dodecyl sulphate (SDS), and 3X saline-sodium citrate (SSC). Hybridization was carried out in Corning slide chambers for sixteen hours at 42°C in a 25% percent formamide, 0.1% SDS, 4X SSC buffer with human Cot-1 DNA, single stranded (SS) poly dA and poly dT DNA, yeast transfer RNA (tRNA) and T7-oligo dT primer as blocking agents. Slides were washed two times for five minutes at room temperature (RT) in 2X SSC, 0.1% SDS, two times for five minutes at 42°C in 0.2X SSC, 0.1% SDS, and two times for five minutes at RT in 0.2X SSC. Slides were scanned using an Axon Instruments GenePix 4200 series scanner provided by the University of Pennsylvania Microarray Facility, and analyzed with GenePix 6.0 software.

Raw signal intensities obtained for each array were background subtracted, logged, then median centered and interquartile range normalized. For each intron microarray spot, we compared the signal intensities across the three dendritic RNA sample replicates against corresponding signal from two arrays hybridized to random hexamer sequence as a compositional control. Introns for which spot intensity on the

experimental arrays was higher than signal intensity on the control arrays, at a significance level of  $p < 0.1$  by t-test, were classified as candidates for retention.

**Illumina sequencing:** Specific read coverage (Tables S2) for our 33 genes of interest was performed using Bowtie (Langmead et al., 2009) version 0.11.3, allowing up to three nucleotide differences per 50-nt read to the reference Rat Genome v. 3.4 (Gibbs et al., 2004). Only paired-end reads genome-wide uniquely aligning to intronic loci, in which at least one end of the pair overlaps non-RepeatMasker-annotated repetitive sequence, were considered. Due to the repeat-rich nature of intronic sequence, this policy will tend to underestimate actual read coverage. Exonic read coverage was estimated by using genome-wide unique single-end read alignments to RefSeq-defined mature mRNA sequences, plus up to 2000 nts of repeat-masked sequence downstream the annotated 3' end of the gene to account for alternate UTR isoforms that are supported by homology evidence. Intergenic read coverage was determined by counting paired reads in non-repeat-overlapping transcription-free regions as annotated by GenBank, RefSeq, Ensembl gene models; as well as genomic alignment of expressed sequence tags and homologous RefSeq transcripts by the UCSC Genome Browser.

***In situ* hybridization and imaging:** Antisense digoxigenin or biotin-labeled probes were produced as runoff transcripts from plasmid DNAs that were digested at a site downstream of the region to be transcribed. Primary rat hippocampal neurons were

fixed for 15 minutes in 4% paraformaldehyde, washed in PBS and permeabilized with 0.3% TritonX-100. Cells were prehybridized at 42C with 50% formamide, 1X Denhardt's solution, 4X SSC, 10mM DTT, 0.1% CHAPS, 0.1% Tween-20, 500ug/ml yeast tRNA, 500ug/ml salmon sperm DNA. *In situ* hybridization was performed at 42C with 10ng/ul (for EGFP probes) or 20ng/ul (for intron probes) probe in prehybridization buffer with additional 8% Dextran sulfate. Rabbit anti-MAP2 antibody was added to cells after probe hybridization followed by goat anti-rabbit antibody and streptavidin conjugated to Qdot 525 and Qdot 605 molecules for imaging. The samples were visualized by confocal microscopy. The emission wavelengths for each fluorescent dye were selectively collected by specific spectral ranges of dyes with either slit width (Olympus fluoview 1000, 60x N.A.1.2 or 20x N.A.0.7) or Meta detector (Zeiss 510 meta, 40x N.A.1.0). The collected images were minimally processed in Metamorph image analysis software and extracted information in regions of interest was transferred to Excel. The images were background subtracted and scaled 0 to 2000 in 12bit bit depth unless indicated in text.

Oligo probe sequences for splice junction *in situ* hybridization were as follows:

| RefSeq ID | Symbol | Junction    | Sequence                   |
|-----------|--------|-------------|----------------------------|
| NM_032990 | GRIA3  | e11-i11     | GATATTTCTCCAAGGTTTGTGTTG   |
| NM_017263 | GRIA4  | e13-i13     | AGAATTCTTCAGAGTAAGTCACAGGA |
| NM_017241 | GRIK1  | i16-e17     | TGTAATCTCCAGTGTCTCTCTTTCA  |
| NM_017241 | GRIK1  | i16-altexon | TTGGTGTAGAGAAGGTTTGTTCATT  |

**ID element targeting and competition.** Intron-derived ID elements were studied using PCR products with primers designed to amplify selected ID elements plus flanking



sequence from retained intron regions. Rat genomic DNA was used as the template to produce amplicons of 137-152 nts in length each roughly centered on the 74-nt ID element. Products were cloned into pEGFP-N1 expression vectors (CMV promoter driven), with the ID region placed upstream of the EGFP coding sequence, to generate ID-EGFP transcripts upon transfection into primary rat hippocampal neurons. *In situ* hybridization was performed on the transfected cells 48 hours post-transfection with probes targeted to the EGFP portion of the sequence. pEGFP-N1 transfected cells were used as a control for ID-independent RNA localization

Sequence elements used for the targeting and competition studies were as follows:

| RefSeq ID | Symbol | Intron | Element_name     | Sense Primer             | Antisense Primer         |
|-----------|--------|--------|------------------|--------------------------|--------------------------|
| NM_021739 | CAMK2B | 3      | CAMK2Bi3ID1long  | GGTTGGGTCGCTTGCAGAAG     | CCTGAAGGCAATGCTCCAAG     |
| NM_021739 | CAMK2B | 3      | CAMK2Bi3ID1short | TGTTAAAAAATGGCATCCAC     | TAGCGGATATGTGGACGCCA     |
| NM_052804 | FMR1   | 1      | FMR1i1ID1long    | TCTTGTGTATTGCAATTTGGG    | ATTCCAAGGTGGGGTGTTA      |
| NM_052804 | FMR1   | 1      | FMR1i1ID1short   | CTTTAGAAATTTTAAGCCG      | TTTAAATTCTATGTAGGC       |
| NM_024370 | GABRG3 | 5      | GABRG3i5ID2long  | AGGACCCACTTCCTCATGTGCTGT | GGTGGCTCTGGGCTCTGTTT     |
| NM_024370 | GABRG3 | 5      | GABRG3i5ID2short | CACATAAGAGACCATGACAC     | CGGCTTGGGGTGTGATGTTT     |
| NM_017241 | GRIK1  | 1      | GRIK1i1ID4long   | TGGCCTCCAGGAACTAGTA      | ATGACCAAGCCCATCTAACA     |
| NM_017241 | GRIK1  | 1      | GRIK1i1ID4short  | AAGAACTAAACTTGAGGGG      | AAGCATTCTGAAAATAGTC      |
| NM_052804 | FMR1   | 1      | FMR1i1B2         | TGAAACCTTGGGTTTGAATCAT   | CATATCTAACTAGGGGTGAGGAAA |

For the IGOR calculations, quantification paths are manually drawn tracing 3 dendrites of selected cells based on MAP2 immunostaining. Path origins were chosen at the somal end of the dendritic process. Generated paths are 11 pixels wide (4.4 $\mu$ m). The average signal intensity along the paths was computed for the *in situ* hybridization channel. These average intensities were normalized to the maximum signal along the path. The average of the normalized values was computed for each cell and then plotted against the distance from the path origin, using Graphpad Prism.

Plots of calculated *in situ* signal in dendrites are presented as  $\Delta F/F$  – i.e., relative

difference in fluorescence signal in ID-EGFP fusion constructs compared to controls – against distance from the cell soma in microns. Signal from each ID-EGFP transfection experiment is binned to find average intensity values across 8 $\mu$ m distances. The differences from binned experimental signal values relative to control signal values are calculated to generate mean and SEM values to distances of 48 $\mu$ m in each plot.

**Computational sequence analysis:** Pairwise NCBI BLAST (Altschul et al., 1990) was run on each pair of intronic sequences represented on the microarray using an e-value cutoff of 1e-10, and results were clustered (single-linkage) based on overlapping gene coordinates. Individual clusters were annotated for presence of repetitive elements, including the ID element, using RepeatMasker (Smit, 1996-2004).

Repeat-masked intron sequence was computationally folded using Vienna RNAplfold 1.7 (Bernhart et al., 2006; Bompfunewerer et al., 2008; Hofacker, 2003) using the default settings. Using a custom Python script, we segmented the base pairs into stable structures of length >50nts, such that at least one base pair had probability > 0.85 in the ensemble. The minimum free energy z-score was calculated on each hairpin candidate using the standard protocol (Clote et al., 2005) as implemented in <http://clavius.bc.edu/clotelab/RNAdinucleotideShuffle/dinucleotideShuffle.html>. The best MFEZ value per intron was extracted for subsequent statistical analysis.

Three miRNA classification programs were run using default parameters on stable (MFEZ < -2) hairpins from introns of interest -- CSHMM (Agarwal et al., 2010), MiPred (Jiang et al., 2007), and Triplet-SVM (Xue et al., 2005). RFAM covariance

models for known miRNAs were also used to score each candidate using the Infernal 1.0.2 cmsearch program (Gardner et al., 2009; Nawrocki et al., 2009), which returns an e-value and bit score for a query sequence against a given miRNA family model. Self containment index was calculated as described in (Lee and Kim, 2008) and indicates structural robustness on a [0.0, 1.0] scale, with a score of 0.9 or better typical of miRNA precursors.

### Supplemental References

Agarwal, S., Vaz, C., Bhattacharya, A., and Srinivasan, A. (2010). Prediction of novel precursor miRNAs using a context-sensitive hidden Markov model (CSHMM). *BMC Bioinformatics* 11 Suppl 1, S29.

Altschul, S.F., Gish, W., Miller, W., Myers, E.W., and Lipman, D.J. (1990). Basic local alignment search tool. *J Mol Biol* 215, 403-410.

Bernhart, S.H., Hofacker, I.L., and Stadler, P.F. (2006). Local RNA base pairing probabilities in large sequences. *Bioinformatics* 22, 614-615.

Bompmfunewerer, A.F., Backofen, R., Bernhart, S.H., Hertel, J., Hofacker, I.L., Stadler, P.F., and Will, S. (2008). Variations on RNA folding and alignment: lessons from Benasque. *J Math Biol* 56, 129-144.

Clote, P., Ferre, F., Kranakis, E., and Krizanc, D. (2005). Structural RNA has lower folding energy than random RNA of the same dinucleotide frequency. *RNA* 11, 578-591.

Gardner, P.P., Daub, J., Tate, J.G., Nawrocki, E.P., Kolbe, D.L., Lindgreen, S., Wilkinson, A.C., Finn, R.D., Griffiths-Jones, S., Eddy, S.R., and Bateman, A. (2009). Rfam: updates to the RNA families database. *Nucleic Acids Res* 37, D136-140.

Gibbs, R.A., Weinstock, G.M., Metzker, M.L., Muzny, D.M., Sodergren, E.J., Scherer, S., Scott, G., Steffen, D., Worley, K.C., Burch, P.E., *et al.* (2004). Genome sequence of

the Brown Norway rat yields insights into mammalian evolution. *Nature* 428, 493-521.

Hofacker, I.L. (2003). Vienna RNA secondary structure server. *Nucleic Acids Res* 31, 3429-3431.

Jiang, P., Wu, H., Wang, W., Ma, W., Sun, X., and Lu, Z. (2007). MiPred: classification of real and pseudo microRNA precursors using random forest prediction model with combined features. *Nucleic Acids Res* 35, W339-344.

Langmead, B., Trapnell, C., Pop, M., and Salzberg, S.L. (2009). Ultrafast and memory-efficient alignment of short DNA sequences to the human genome. *Genome Biol* 10, R25.

Lee, M.T., and Kim, J. (2008). Self containment, a property of modular RNA structures, distinguishes microRNAs. *PLoS Comput Biol* 4, e1000150.

Miyashiro, K., Dichter, M., and Eberwine, J. (1994). On the nature and differential distribution of mRNAs in hippocampal neurites: implications for neuronal functioning. *Proceedings of the National Academy of Sciences of the United States of America* 91, 10800-10804.

Muslimov, I.A., Iacoangeli, A., Brosius, J., and Tiedge, H. (2006). Spatial codes in dendritic BC1 RNA. *The Journal of cell biology* 175, 427-439.

Nawrocki, E.P., Kolbe, D.L., and Eddy, S.R. (2009). Infernal 1.0: inference of RNA alignments. *Bioinformatics* 25, 1335-1337.

Smit, A., Hubley, R & Green, P (1996-2004). RepeatMasker Open-3.0. .

Xue, C., Li, F., He, T., Liu, G.P., Li, Y., and Zhang, X. (2005). Classification of real and pseudo microRNA precursors using local structure-sequence features and support vector machine. *BMC Bioinformatics* 6, 310.

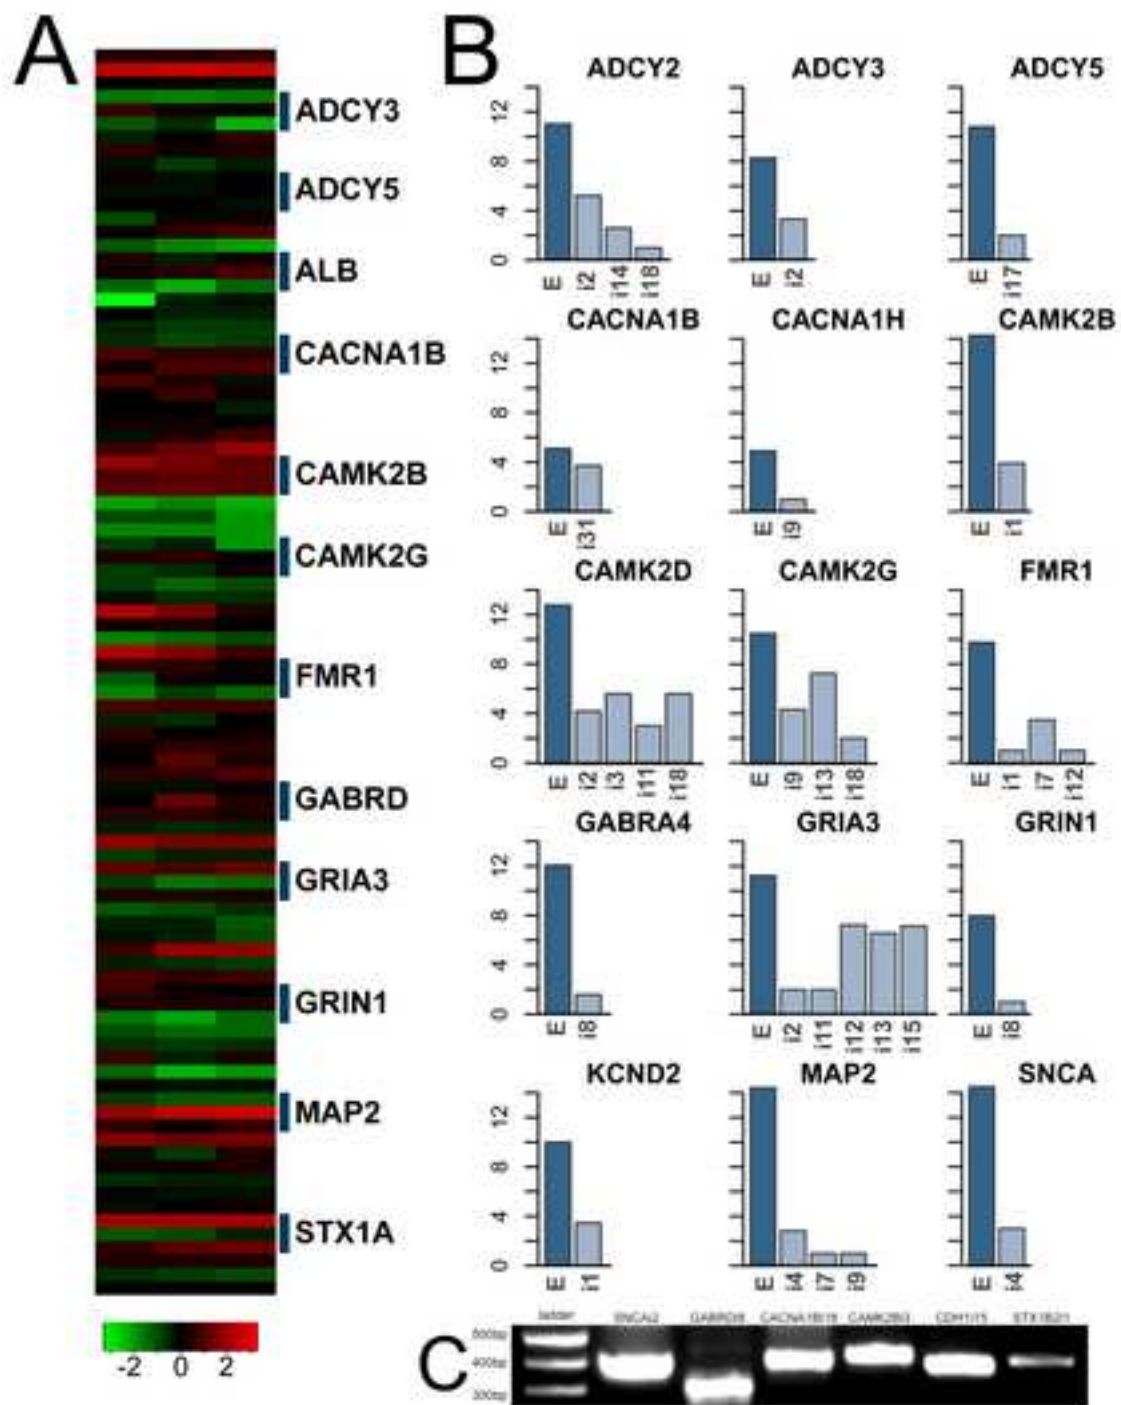

Figure S1

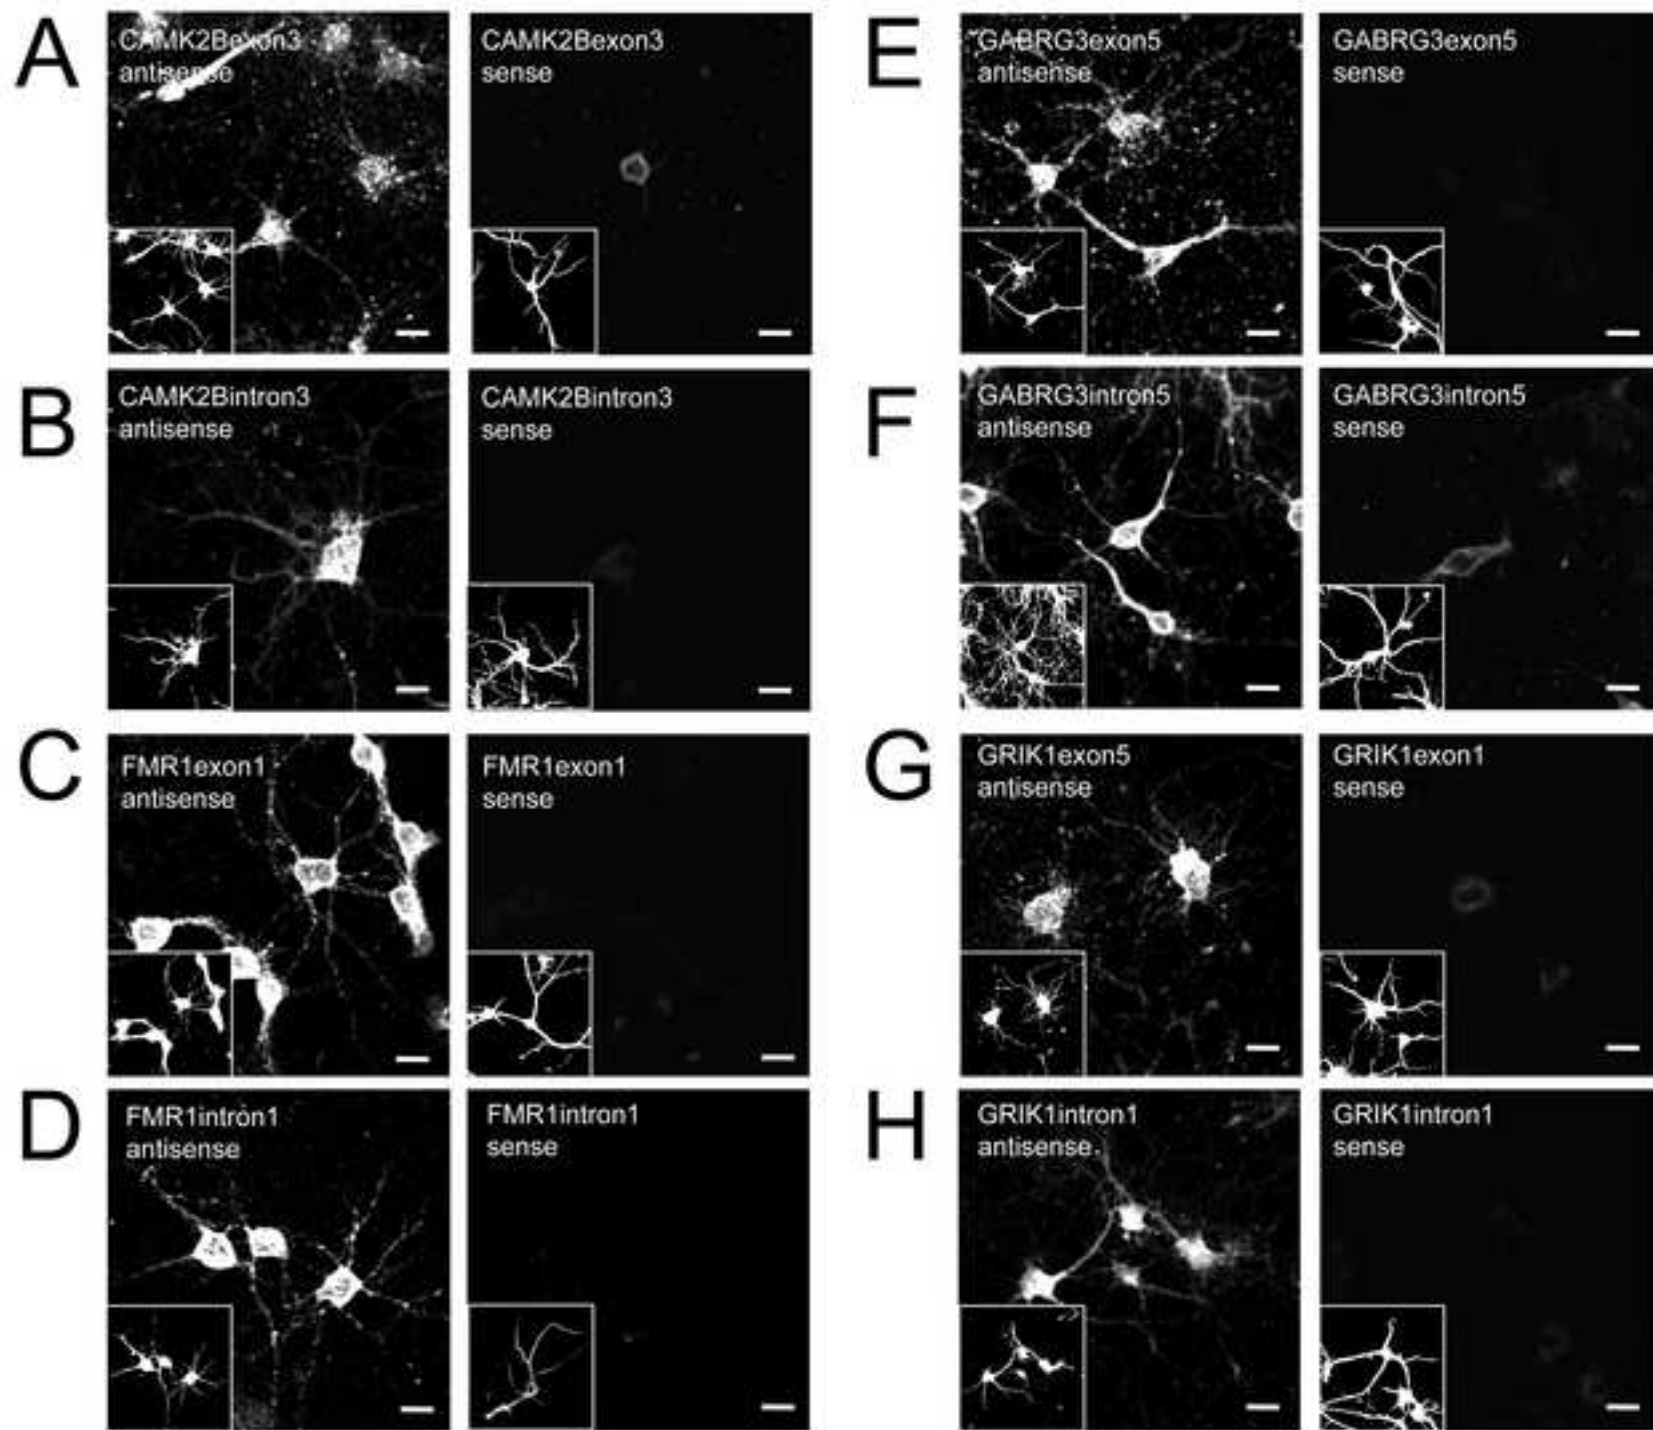

Figure S2

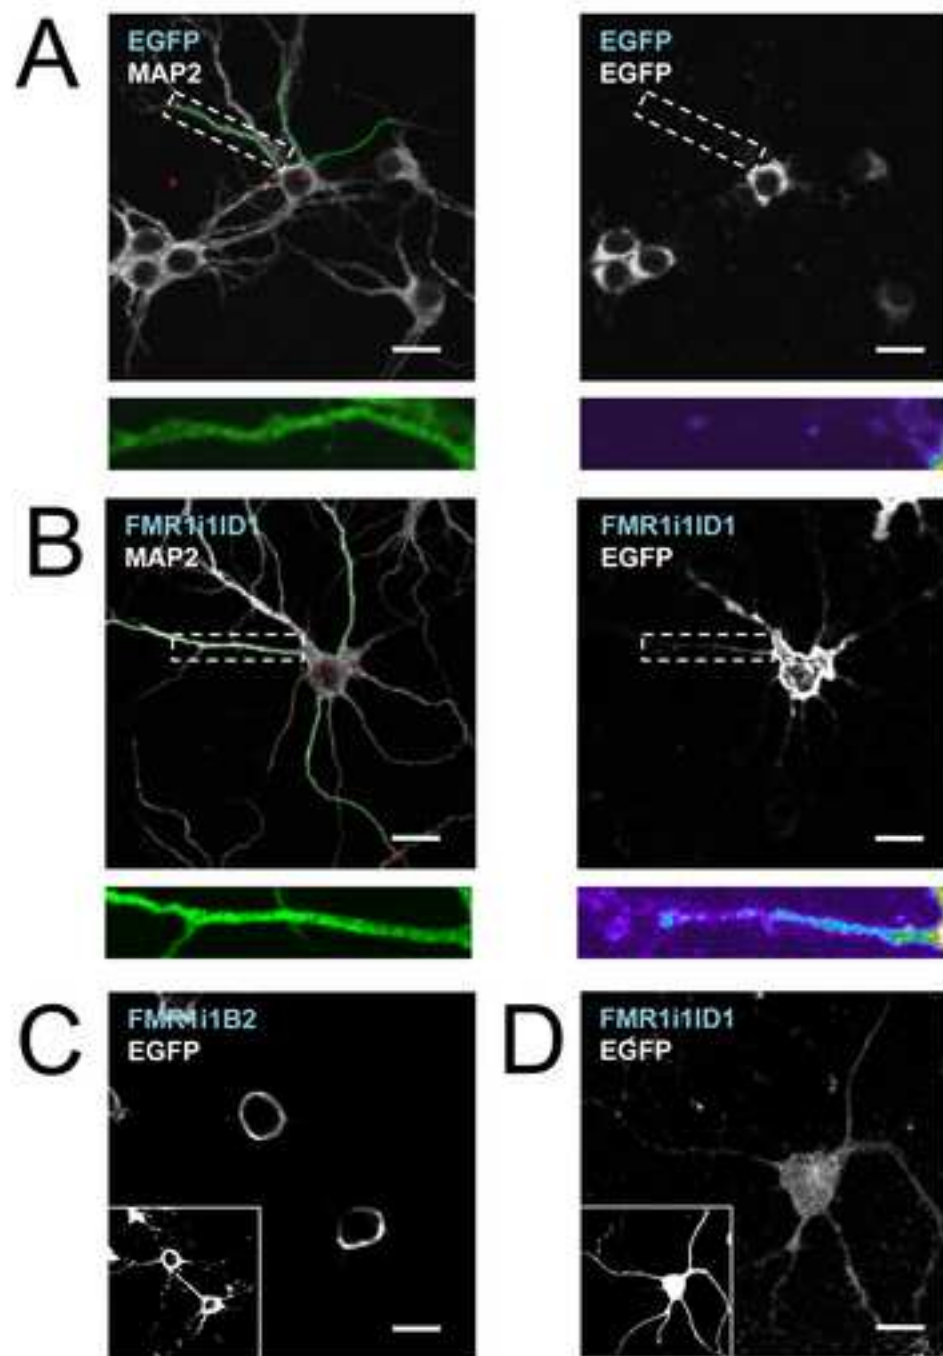

Figure S3

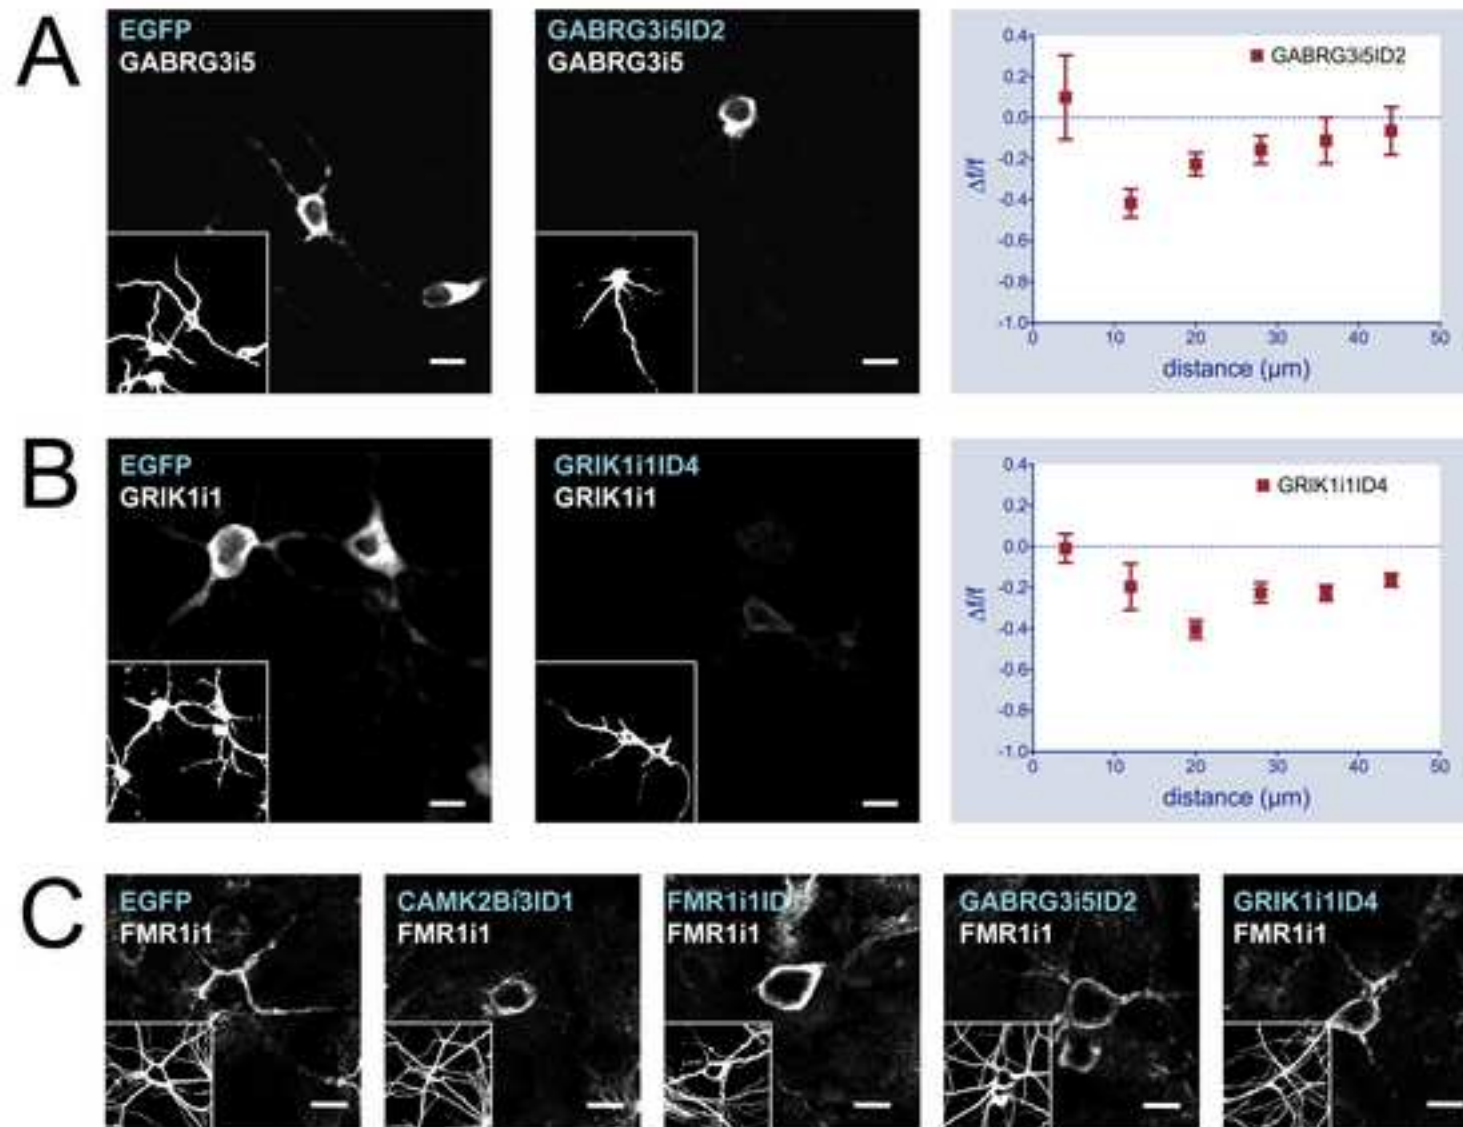

Figure S4
